# Supplementary material for: Hyaluronic Acid–Zein Core-Shell Nanoparticles Improve the Anticancer Effect of Curcumin Alone or in Combination with Oxaliplatin against Colorectal Cancer via CD44-Mediated Cellular Uptake
Source: MDPI journal article supplement (doi:10.3390/molecules27051498), 2022-02-23
Supplement: s1 [file s1]

## Supplementary Material

**Supplementary Table S1** Encapsulation efficiency (EE) and loading capacity (LC) of CUR-loaded composite nanoparticles.

|          | EE (%)         | LC (%)        |
|----------|----------------|---------------|
| Zein-CUR | 76.49 ± 3.02   | 6.95 ± 0.27   |
| HZ-CUR   | 97.12 ± 1.86 * | 7.47 ± 0.14 * |

Values are means ± SD, n = 3, \* $p < 0.05$  relative to Zein-CUR .

**Table S2** IC<sub>50</sub> values of CUR and HZ-CUR in HCT116, HCT8, and HT29 cells.

| IC <sub>50</sub> (µg/mL) | HCT116        | HCT8          | HT29         |
|--------------------------|---------------|---------------|--------------|
| CUR                      | 6.79 ± 0.83   | 7.45 ± 0.87   | 8.52 ± 0.93  |
| HZ-CUR                   | 5.03 ± 0.70 * | 5.31 ± 0.73 * | 6.3 ± 0.80 * |

Values are means ± SD, n = 3, \* $p < 0.05$  relative to CUR.
